# Supplementary material for: Ultrastructural and Descriptive Study on the Adult Body Surface of Heortia vitessoides (Lepidoptera: Crambidae)
Source: MDPI journal article supplement (doi:10.3390/insects14080687), 2023-08-03
Supplement: s1 [file s1]

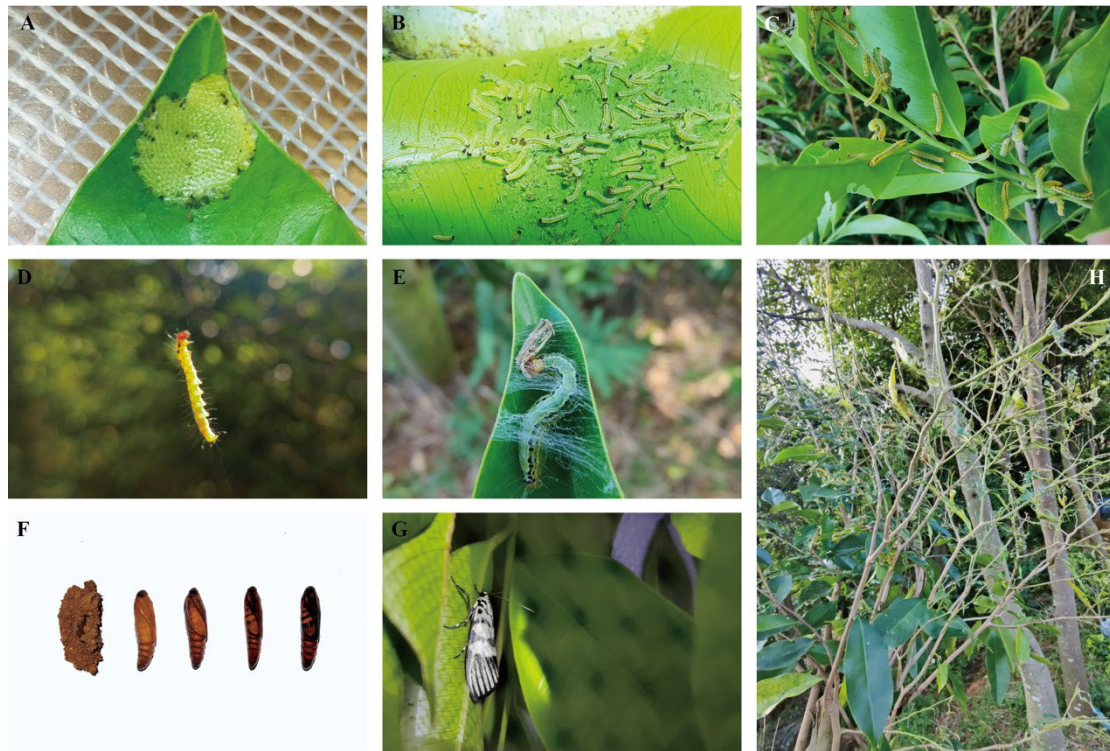

**Figure S1.** Physiological development of *Heortia vitessoides*. (A) Egg masses gathered at the abaxial tip of a juvenile leaf; (B) second instar *H. vitessoides* larvae gathering to feed on leaf flesh; (C) third instar larvae dispersing to feed on the entire leaf; (D) fifth instar larvae descending along a silk thread to undergo pupation in the soil. (E) fifth instar larvae cocooning on the leaf to pupate; (F) pupae at different stages. The gradual darkening of the pupa's color and the emergence of wing patterns signify the completion of development and its readiness to undergo eclosion. (G) *H. vitessoides* adults resting on the leaves of *Aquilaria sinensis*; (H) the leaves on the branches of *A. sinensis* are completely consumed by the larvae of *H. vitessoides*.
